# Supplementary material
Source: MDPI journal article supplement (https://www.mdpi.com/2304-6740/3/1/21)
Supplement: s1 [file s1]

## Supplementary Information

**Table S1.** Crystal data and structure refinement for  $[\text{Ga}_{30}(\mu_4\text{-O})_{12}(\mu_3\text{-O})_4(\mu_3\text{-OH})_4(\mu_2\text{-OH})_{42}(\text{H}_2\text{O})_{16}](2,6\text{-NDS})_6 \cdot 47\text{H}_2\text{O}$ . The structure is filed in the Cambridge Structural Database as CCDC 1038690.

|                                           |                                                                                                                                                  |
|-------------------------------------------|--------------------------------------------------------------------------------------------------------------------------------------------------|
| Identification code                       | mn2113                                                                                                                                           |
| Empirical formula <sup>a</sup>            | $\text{C}_{60}\text{H}_{208}\text{Ga}_{30}\text{O}_{161}\text{S}_{12}$                                                                           |
| Formula weight <sup>a</sup>               | 5982.57                                                                                                                                          |
| Temperature                               | 100(2) K                                                                                                                                         |
| Wavelength <sup>b</sup>                   | 0.7749 Å, synchrotron radiation                                                                                                                  |
| Crystal system                            | triclinic                                                                                                                                        |
| Space group                               | P-1                                                                                                                                              |
| Unit cell dimensions                      | $a = 16.0487(7)$ Å; $a = 112.7753(16)^\circ$<br>$b = 17.6742(7)$ Å; $b = 105.1611(18)^\circ$<br>$c = 18.6218(8)$ Å; $\gamma = 94.7401(18)^\circ$ |
| Volume                                    | 4599.2(3) Å <sup>3</sup>                                                                                                                         |
| Z                                         | 1                                                                                                                                                |
| Density (calculated)                      | 2.160 Mg/m <sup>3</sup>                                                                                                                          |
| Absorption coefficient                    | 5.761 mm <sup>-1</sup>                                                                                                                           |
| F(000)                                    | 2978                                                                                                                                             |
| Crystal size                              | 0.094 × 0.094 × 0.075 mm <sup>3</sup>                                                                                                            |
| Crystal color and habit                   | colorless block                                                                                                                                  |
| Diffractometer                            | Bruker D8 with Photon 100 detector                                                                                                               |
| Θ range for data collection               | 2.183 to 40.222°.                                                                                                                                |
| Index ranges                              | −26 ≤ h ≤ 26, −29 ≤ k ≤ 29, −30 ≤ l ≤ 31                                                                                                         |
| Reflections collected                     | 105735                                                                                                                                           |
| Independent reflections                   | 43758 [ $R(\text{int}) = 0.0340$ ]                                                                                                               |
| Observed reflections ( $I > 2\sigma(I)$ ) | 31256                                                                                                                                            |
| Completeness to $\Theta = 27.706^\circ$   | 99.70%                                                                                                                                           |
| Absorption correction                     | multi-scan                                                                                                                                       |
| Max. and min. transmission                | 0.749 and 0.675                                                                                                                                  |
| Solution method                           | SHELXS (Sheldrick, 2013)                                                                                                                         |
| Refinement method                         | SHELXL-2014/7 (Sheldrick, 2014)                                                                                                                  |
| Data / restraints / parameters            | 43758/391/1477                                                                                                                                   |
| Goodness-of-fit on F <sup>2</sup>         | 1.046                                                                                                                                            |
| Final R indices [ $I > 2\sigma(I)$ ]      | $R_1 = 0.0539$ , $wR_2 = 0.1484$                                                                                                                 |
| R indices (all data)                      | $R_1 = 0.0839$ , $wR_2 = 0.1704$                                                                                                                 |
| Extinction coefficient                    | n/a                                                                                                                                              |
| Largest diff. peak and hole               | 3.502 and −2.774 e.Å <sup>-3</sup>                                                                                                               |

<sup>a</sup> Includes missing hydrate hydrogen atoms.
